# Supplementary material
Source: PubMed Central journal article supplement (PMC7146887)
Supplement: sb9b00448_si_001.pdf [file sb9b00448_si_001.pdf]

# Development of high-performance whole cell biosensors aided by statistical modelling

Adokiye Berepiki,<sup>†</sup> Ross Kent,<sup>†</sup> Leopoldo F. M. Machado,<sup>†</sup> Neil Dixon<sup>†‡\*</sup>

<sup>†</sup>Manchester Institute of Biotechnology (MIB), <sup>‡</sup>SYNBIOCHEM, Department of Chemistry, University of Manchester, Manchester, M1 7DN, UK

## SUPPORTING INFORMATION

### Contents

|                               |     |
|-------------------------------|-----|
| Additional Methods.....       | p2  |
| Supplementary Figure 1.....   | p5  |
| Supplementary Figure 2.....   | p6  |
| Supplementary Figure 3.....   | p7  |
| Supplementary Figure 4.....   | p8  |
| Supplementary Table 1.....    | p9  |
| Supplementary Table 2.....    | p10 |
| Supplementary Table 3.....    | p11 |
| Supplementary Table 4.....    | p12 |
| Supplementary Table 5.....    | p13 |
| Supplementary Table 6.....    | p14 |
| Supplementary Table 7.....    | p15 |
| Supplementary Table 8.....    | p16 |
| Supplementary Table 9.....    | p17 |
| Supplementary Table 10.....   | p18 |
| Supplementary Table 11.....   | p22 |
| Supplementary Table 12.....   | p23 |
| Supplementary Table 13.....   | p24 |
| Supplementary References..... | p25 |

### **Additional methods - Molecular cloning**

The PCA biosensor was assembled by isothermal assembly from the following fragments: pSEVA131 linearized by inverse PCR (primers AB9/10); *mCherry* amplified with primers AB15/28 from a synthetic gene (GeneArt); *sfGFP* amplified with primers AB18/27 from a synthetic gene (GeneArt), and synthetic DNA (IDT) incorporating the ProB promoter (1) fused to a strong RBS (gaaataaggaggtaatacaa) (2), the  $P_{PV}$  promoter (3) fused to the G10 RBS (4) and a 150 bp spacer (5) to yield the template plasmid (p131B). Promoter ( $P_{reg-lib}$  and  $P_{out-lib}$ ) and RBS ( $RBS_{out-lib}$ ) libraries were generated by linearising p131B by inverse PCR with primers AB27/94 (for  $P_{out-lib}$  and  $RBS_{out-lib}$ ) and AB146/147 (for  $P_{reg-lib}$ ) and inserting the following degenerate ssDNA oligonucleotides via isothermal assembly: for  $P_{out-lib}$  oligo AB115, for  $RBS_{out-lib}$  oligo AB114, and for  $P_{reg-lib}$  oligo AB148 (Supplementary Table 12). The library members were designated p131B-BX for  $P_{reg-lib}$ , p131B-GX for  $RBS_{out-lib}$ , and p131-VX for  $P_{out-lib}$ , with X denoting the clone number, which was assigned based on subsequent screening and rank order of expression output.

Constructs corresponding to the DoE Definitive Screening Design table (Table 1) were generated in three stages. Firstly, *mCherry* was replaced with *pcaV* using *in vivo* assembly, using the selected library plasmids (those with  $P_{reg}$  at level -1, 0 and +1) linearized by inverse PCR with primers AB10/128, and *pcaV* amplified from pPv-Pcav (p44-pcaV) (3) with primers AB96/127, to yield pD2 ( $P_{reg}/P_{out}/RBS_{out}$  pattern at level 0/+1/+1), pD7 ( $P_{reg}/P_{out}/RBS_{out}$  at levels +1/+1/+1), and p131C-B20 ( $P_{reg}/P_{out}/RBS_{out}$  pattern at level -1/+1/+1). Secondly, these plasmids were again linearized by inverse PCR with primers AB27/94 and the oligos AB142, AB143, AB144 and AB145 (corresponding  $P_{out}/RBS_{out}$  patterns at level 0/-1, 0/0, -1/-1 and -1/0, respectively), were inserted by isothermal assembly to create plasmids pD1 ( $P_{reg}/P_{out}/RBS_{out}$  pattern at level 0/0/0), pD3 ( $P_{reg}/P_{out}/RBS_{out}$  pattern at level -1/-1/-1), pD4 ( $P_{reg}/P_{out}/RBS_{out}$  pattern at level +1/-1/0), pD6 ( $P_{reg}/P_{out}/RBS_{out}$  pattern at level 0/-1/-1), and pD8 ( $P_{reg}/P_{out}/RBS_{out}$  pattern at level +1/0/-1). Next, the final set of DoE constructs were made by *in vivo assembly* using selected plasmids from the  $P_{out-lib}$  and  $RBS_{out-lib}$  libraries linearized by inverse PCR with primers AB10/130, and  $P_{reg-pcaV}$  amplified with primers AB11/129 from pD2, pD7 and p131C-B20. This yielded plasmids pD5 ( $P_{reg}/P_{out}/RBS_{out}$  pattern at level -1/+1/0), pD9 ( $P_{reg}/P_{out}/RBS_{out}$  pattern at level +1/-1/+1), pD10 ( $P_{reg}/P_{out}/RBS_{out}$  pattern at level -1/0/+1), pD11 ( $P_{reg}/P_{out}/RBS_{out}$  pattern at level +1/+1/-1), pD12 ( $P_{reg}/P_{out}/RBS_{out}$  pattern at level -1/-1/+1), and pD13 ( $P_{reg}/P_{out}/RBS_{out}$  pattern at level -1/+1/-1). Validation constructs for modelling of the DoE dataset were created with *in vivo* assembly using selected members of the  $P_{reg}$

library linearized by inverse PCR (primers AB10/128) and *pcaV* amplified by PCR (primers AB96/127) from p44-*pcaV*. The pKIKO set of vectors (6) was used to make genomic insertions of different PAB variants. The PAB was amplified from selected DoE plasmids by PCR with primers AB101/102 and inserted via *in vivo* assembly into pKIKOarsBkm that had been linearized by inverse PCR with primers AB29/30.

For the ferulic acid biosensor (FAB) designs, the pFABsP vector was constructed by isothermal assembly, using (i) pET28a (Novagen) served as a backbone and linearized by PCR with primers FAB1/2 to remove *lacI* and the T7 promoter; (ii) the chimeric  $P_{LC}$  promoter-operator (7) and the G10 RBS were incorporated into the forward primer of the FAB3/4 pair and used to amplify *sfGFP* from a synthetic gene (IDT) and (iii) the FerC transcription factor and FerA enzyme (7) amplified with primers FAB5/6 from p15FABs to yield pFABsP. The new strong promoter-operator  $P_{LC2}$  (Supplementary Figure 3) was synthesised as a gBlock (IDT) and exchanged with the  $P_{LC}$  promoter by isothermal assembly using pFABsP $_{LC}$  linearized by inverse PCR with primers FAB6/7.

The plasmids for DoE pFABs1 ( $P_{regC}/P_{enzA}/RBS_{out}$  pattern at levels -1/-1/+1) to pFABs9 ( $P_{regC}/P_{enzA}/RBS_{out}$  pattern at levels +1/+1/+1) were generated using the pFABsP $_{LC2}$  as backbone. The constructs were made by isothermal assembly using four PCR products as parts: (i) The backbone with *ferA\_p28* (ColE1) $_{P_{LC2}}G10_{sfGFP}$  was linearized from pFABsP $_{LC2}$  with primers FAB9/10, (ii) Promoters corresponding to levels -1, 0 and +1 from the  $P_{reg}$  library (B20, B10 and B12, respectively) amplified with primers FAB11/12 to be placed upstream to *ferC* (renamed as  $P_{regC}$  promoters), (iii) *ferC* amplified with primers FAB13/14 from p15ferCA (7), (iv) Promoters corresponding to levels -1, 0 and +1 from the  $P_{reg}$  library (B20, B10 and B12, respectively) amplified with primers FAB15/16 to be placed upstream of *ferA* (renamed as  $P_{enzA}$  promoters). Plasmids lacking *ferC* (pFABsPLC2 FerC KO) or *ferA* (pFABsPLC2 FerA KO) were made by linearizing and reassembling pFABsP $_{LC2}$  by inverse PCR (FAB17/18 and FAB19/20, respectively).

The plasmids for the second iteration pFABsG12 ( $P_{regC}/P_{enzA}/RBS_{out}$  pattern at levels +1/+1/+0.81), pFABsG19 ( $P_{regC}/P_{enzA}/RBS_{out}$  pattern at levels +1/+1/+0.89) and pFABsG21 ( $P_{regC}/P_{enzA}/RBS_{out}$  pattern at levels +1/+1/+0.94) were generated using pFABs9 as backbone. Forward primers (FAB21, FAB22, FAB23) were designed with the sequences from the  $RBS_{out}$  library corresponding to levels 0.81, 0.89 and 0.94. A reverse primer (FAB24) with overlapping nucleotides to the forward primers was designed. Inverse PCR of pFABs9 with these primers followed by isothermal assembly was carried out to insert the new RBS sequences.

The *pcaK* gene from *Pseudomonas putida* was synthesized (IDT) with codon-optimisation for expression in *E. coli* with a short translational initiation region (AGGAGGAAAAAAA) at the 5' of the start codon. The gene was inserted downstream of *pcaV* via *in vivo* assembly into plasmid p131C-B10, linearised by PCR with primers AB10/167, to create p131C-B10-*pcaK*. The extender plasmid p261-*lacI-pcaK*, contains the p15A origin and a kanamycin selection marker, and was assembled by isothermal assembly from the following fragments: (i) the pSEVA261 backbone and linearized by inverse PCR with primers AB9/10; (ii) the *lacI* gene amplified by PCR from pET44 with primers AB197/198; (iii) the  $P_{pv}$  promoter, G10 RBS (set at level 0) and a 150 bp spacer amplified by PCR with primers AB195/196; and (iv) synthetic DNA (IDT) consisting of the  $P_{LacO1}$  promoter (8) and G10 RBS (level -1). The additional combinatorial RBS constructs were constructed by isothermal assembly using ssDNA oligonucleotides (IDT) (AB 303-309) into the p261-*lacI-pcaK* backbone, linearized by inverse PCR with primers AB 301/302.

Benchmarking plasmids were constructed by *in vivo* assembly. pET44 and pBAD were linearised by inverse PCR with primers AB159/160 and AB163/164, respectively. *sfGFP* was amplified from p131B with primers AB161/162 for insertion into pET44 and AB165/166 for insertion into pBAD. pCK302 was a gift from John Heap (Addgene plasmid #87768).

## SUPPLEMENTARY FIGURES

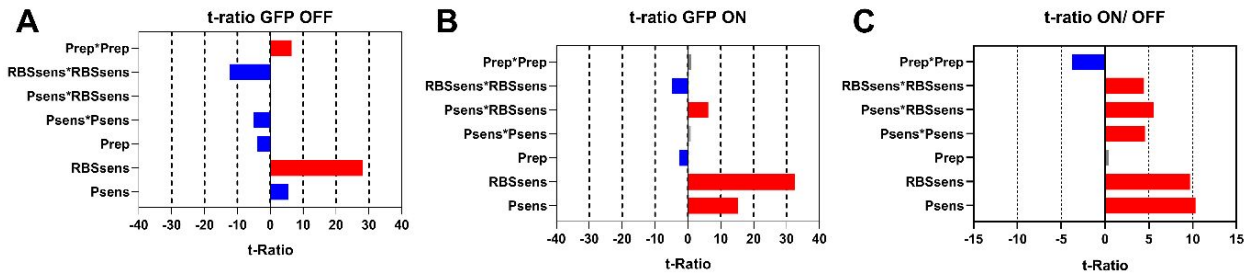

### Supplementary Figure 1. Factor screening and selection

(A-C) Lenth t-ratio of each factor, (A) OFF, (B) ON, and (C) ON/ OFF, showing those factors deemed important by the JMP factor screening platform. The t-ratio is derived from the PSE (OFF PSE = 38.2239, ON PSE = 206.038, ON/ OFF PSE = 0.71191) and is used to assess factor importance. The colour of the bar indicates the predicted effect of this factor on the indicated response (blue – negative, red – positive). Factors deemed significant at the 0.1 confidence level are deemed significant and were included in the model.

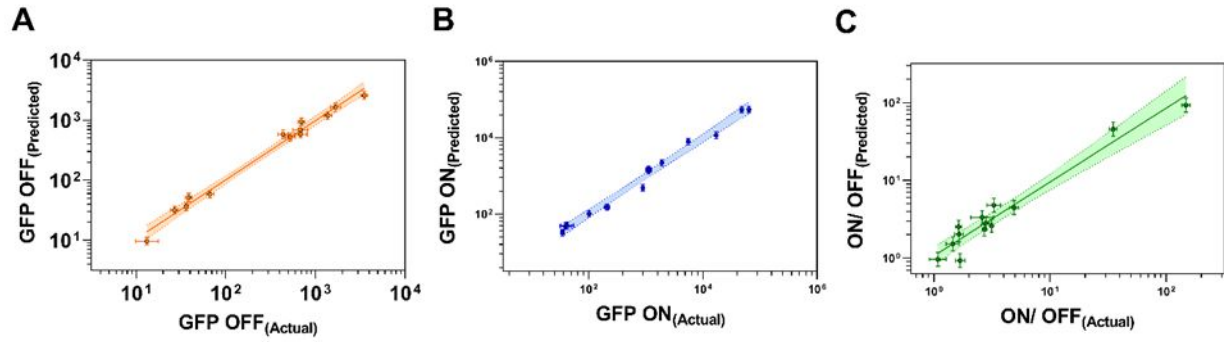

**Supplementary Figure 2. Least Squares model performance**

Actual versus predicted plots showing the performance of the Least Squares regression model in predicting (A) OFF, (B) ON and (C) ON/OFF. The model shows good prediction of all three responses. OFF  $R^2 = 0.986$ ,  $P = 1.2 \times 10^{-11}$ , ON  $R^2 = 0.988$ ,  $P = 6.8 \times 10^{-12}$ , ON/ OFF  $R^2 = 0.95$ ,  $P = 1.6 \times 10^{-08}$ .

1. P<sub>LC</sub>

-35
-10

GCATGCT ATGCTATGGCTTATAGCAT TTGACA ATGCTATGGCTTATAGCAT GATACT GAGCACATCAGCA  
GGACGCACTGACCGA TTAACTTTAAGAAGGAGATATACAT atg...

2. P<sub>LC2</sub>

-35
-10

GCATGCA ATGCTATGGCTTATAGCAT TTGACA GCTAGCTCAGTCCTAGGT ATGCTATGGCTTATAGCAT G  
ACGCACTGACCGA TTAACTTTAAGAAGGAGATATACAT atg...

\**Sphingobium* Operator: (19 bp) IR2: ATGCTATGGCTTATAGCAT

### Supplementary Figure 3. Reengineering of the promoter-operator for the FA Biosensor.

The original promoter-operators P<sub>LC</sub> (1) and new reengineered P<sub>LC2</sub> (2) sequences downstream to a 5' prime region and the Rogers G10 RBS (orange) followed by a sfGFP gene are shown. The IR2 palindromic DNA operator sequence from *Sphingobium* (light blue) is also shown. The promoter P<sub>LC2</sub> was designed replacing the -35 region of the Phage lambda promoter (P<sub>L</sub>) for IR2 and fusing it with the spacer sequence of the strong constitutive promoter from the Anderson's library (BBa\_J23119).

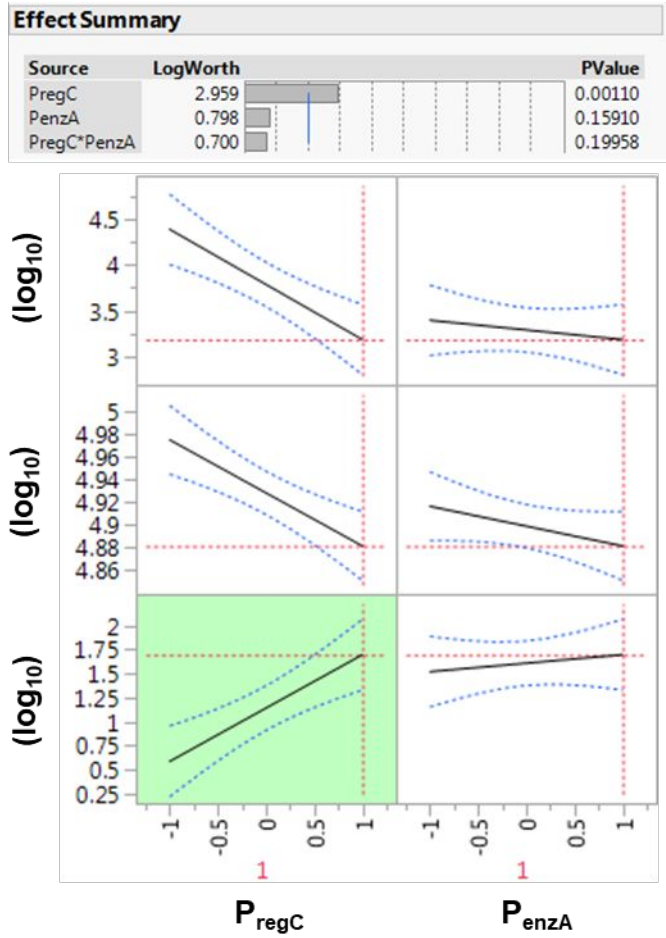

**Supplementary Figure 4. Full factorial DoE model for FAB.**

Standard least squares regression (SLSR) model of the DoE dataset. Effect summary of  $P_{regC}$ ,  $P_{enzA}$  and  $P_{regC} \cdot P_{enzA}$  for OFF, ON and ON/OFF showing significant effect of  $P_{regC}$  ( $P < 0.05$ ) for the performance. Model prediction of  $P_{regC}$  and  $P_{enzA}$  for OFF, ON and ON/OFF showing positive linear effect of  $P_{regC}$  levels for ON/OFF (green framed square).



## SUPPLEMENTARY TABLES

**Supplementary Table 1.** Raw data for the PAB definitive screening design.

| Construct | Trial | $P_{reg}$ | $P_{out}$ | $RBS_{out}$ | OFF    |        |        | ON      |         |         |
|-----------|-------|-----------|-----------|-------------|--------|--------|--------|---------|---------|---------|
| pD1       | 1     | 0         | 0         | 0           | 612.7  | 578.4  | 590.6  | 1013.8  | 1046.0  | 1046.6  |
| pD2       | 2     | 0         | 1         | 1           | 398.5  | 394.3  | 400.9  | 61768.3 | 61213.1 | 63230.6 |
| pD3       | 3     | -1        | -1        | -1          | 28.3   | 29.6   | 28.8   | 41.8    | 44.3    | 51.0    |
| pD4       | 4     | 1         | -1        | 0           | 481.0  | 481.0  | 477.5  | 843.2   | 867.3   | 870.9   |
| pD5       | 5     | -1        | 1         | 0           | 1533.6 | 1593.5 | 1502.7 | 5430.4  | 5621.1  | 5587.0  |
| pD6       | 6     | 0         | -1        | -1          | 21.0   | 14.1   | 13.8   | 34.0    | 42.1    | 31.8    |
| pD7       | 7     | 1         | 1         | 1           | 1247.3 | 1322.5 | 1276.7 | 45791.4 | 46571.6 | 49052.4 |
| pD8       | 8     | 1         | 0         | -1          | 36.3   | 40.2   | 46.4   | 46.5    | 51.9    | 50.8    |
| pD9       | 9     | 1         | -1        | 1           | 593.7  | 602.0  | 630.9  | 1035.5  | 1037.7  | 1025.5  |
| pD10      | 10    | -1        | 0         | 1           | 3252.4 | 3255.1 | 3407.2 | 17056.6 | 17312.8 | 17266.8 |
| pD11      | 11    | 1         | 1         | -1          | 32.6   | 37.9   | 42.5   | 96.9    | 101.9   | 101.2   |
| pD12      | 12    | -1        | -1        | 1           | 645.4  | 650.4  | 683.4  | 1753.2  | 1969.2  | 1801.8  |
| pD13      | 13    | -1        | 1         | -1          | 84.2   | 64.5   | 67.1   | 220.5   | 246.6   | 212.7   |

**Supplementary Table 2.** Definitive screening design factor screening.

| Term                        | GFP OFF (log10) |               |                    |                      | GFP OFF (log10) |               |                    |                      | GFP OFF (log10) |               |                    |                      |
|-----------------------------|-----------------|---------------|--------------------|----------------------|-----------------|---------------|--------------------|----------------------|-----------------|---------------|--------------------|----------------------|
|                             | Contrast        | Lenth t-Ratio | Individual p-value | Simultaneous p-Value | Contrast        | Lenth t-Ratio | Individual p-value | Simultaneous p-Value | Contrast        | Lenth t-Ratio | Individual p-value | Simultaneous p-Value |
| <b>Prep</b>                 | -293.405        | -11.57        | 1.5E-09            | 1.60341E-05          | 2214.7          | 8.74          | 0.000118247        | 0.000708798          | 2.3319          | 2.33          | 0.033105519        | 0.408426961          |
| <b>Prep*Prep</b>            | 223.873         | 8.83          | 3.0372E-06         | 0.000473797          | -2015.4         | -7.95         | 0.000183189        | 0.001025964          | -13.298         | -13.3         | 4E-10              | 2.53E-08             |
| <b>Prep*Psens</b>           | -182.802        | -7.21         | 0.000132789        | 0.002035138          | 10014.2         | 39.5          | < 1.0E-25          | < 1.0E-25            | 15.9431         | 15.95         | <8.5E-15           | <3.2E-11             |
| <b>Psens</b>                | 145.343         | 5.73          | 0.000783357        | 0.007750242          | -996.1          | -3.93         | 0.004264757        | 0.059177616          | -5.1029         | -5.11         | 0.00108595         | 0.014827773          |
| <b>Psens*Psens</b>          | -278.853        | -11           | 8.8E-09            | 0.000038746          | 1974.3          | 7.79          | 0.000196565        | 0.001084874          | 7.439           | 7.44          | 0.000206546        | 0.002076476          |
| <b>RBSsens</b>              | 575.014         | 22.68         | < 1.0E-25          | <1.8E-16             | 11588.6         | 45.71         | < 1.0E-25          | < 1.0E-25            | 15.8569         | 15.86         | <1.1E-14           | <4.0E-11             |
| <b>RBSsens*Prep</b>         | -210.003        | -8.28         | 1.10021E-05        | 0.000640039          | -767.3          | -3.03         | 0.01308755         | 0.183798057          | -7.932          | -7.94         | 0.000151893        | 0.001130195          |
| <b>RBSsens*Prep*Prep</b>    | 312.489         | 12.32         | 1E-10              | 4.7395E-06           | 10695.3         | 42.19         | < 1.0E-25          | < 1.0E-25            | 17.3039         | 17.31         | <6.2E-17           | <6.6E-13             |
| <b>RBSsens*Prep*Psens</b>   | -305.415        | -12.05        | 3E-10              | 7.5076E-06           | -1970.9         | -7.77         | 0.000197683        | 0.001089795          | -13.7655        | -13.77        | 1E-10              | 8.5E-09              |
| <b>RBSsens*Psens</b>        | 228.542         | 9.01          | 1.9361E-06         | 0.000452371          | 2303.5          | 9.09          | 3.96331E-05        | 0.000462061          | 6.8437          | 6.85          | 0.000295195        | 0.003063257          |
| <b>RBSsens*RBSsens</b>      | -116.524        | -4.6          | 0.00141157         | 0.025293161          | 4548.2          | 17.94         | <3.2E-16           | 0.0000001            | 6.6929          | 6.7           | 0.000413395        | 0.003446297          |
| <b>RBSsens*RBSsens*Prep</b> | 41.775          | 1.65          | 0.103189081        | 0.853679627          | 3330.2          | 13.14         | 5.8E-09            | 0.000132891          | 10.3242         | 10.33         | 9.099E-07          | 1.16639E-05          |

**Supplementary Table 3.** Parameter estimates for standard least squares model.

| Term                   | GFP OFF (log10) |           |         |         | GFP ON (log10) |           |         |         | GFP ON/OFF (log10) |           |         |         |
|------------------------|-----------------|-----------|---------|---------|----------------|-----------|---------|---------|--------------------|-----------|---------|---------|
|                        | Estimate        | Std Error | t Ratio | Prob> t | Estimate       | Std Error | t Ratio | Prob> t | Estimate           | Std Error | t Ratio | Prob> t |
| <b>Intercept</b>       | 2.840341        | 0.071618  | 39.66   | <.0001  | 3.144749       | 0.091299  | 34.44   | <.0001  | 0.304408           | 0.097342  | 3.13    | 0.0058  |
| <b>Psens</b>           | 0.144009        | 0.026528  | 5.43    | <.0001  | 0.516504       | 0.033819  | 15.27   | <.0001  | 0.372495           | 0.036057  | 10.33   | <.0001  |
| <b>RBSsens</b>         | 0.748324        | 0.026528  | 28.21   | <.0001  | 1.097718       | 0.033819  | 32.46   | <.0001  | 0.349394           | 0.036057  | 9.69    | <.0001  |
| <b>Prep</b>            | -0.10328        | 0.026528  | -3.89   | 0.0011  | -0.08711       | 0.033819  | -2.58   | 0.019   | 0.01617            | 0.036057  | 0.45    | 0.6592  |
| <b>Psens*Psens</b>     | -0.28425        | 0.056222  | -5.06   | <.0001  | 0.063164       | 0.071673  | 0.88    | 0.3898  | 0.347418           | 0.076417  | 4.55    | 0.0003  |
| <b>Psens*RBSsens</b>   | 0.011279        | 0.033663  | 0.34    | 0.7415  | 0.266777       | 0.042913  | 6.22    | <.0001  | 0.255498           | 0.045754  | 5.58    | <.0001  |
| <b>RBSsens*RBSsens</b> | -0.69105        | 0.056222  | -12.29  | <.0001  | -0.3521        | 0.071673  | -4.91   | 0.0001  | 0.338954           | 0.076417  | 4.44    | 0.0003  |
| <b>Prep*Prep</b>       | 0.413538        | 0.063683  | 6.49    | <.0001  | 0.086261       | 0.081184  | 1.06    | 0.302   | -0.32728           | 0.086558  | -3.78   | 0.0014  |

**Supplementary Table 4.** Tuning the PAB for optimal performance by varying the level of  $P_{\text{reg}}$  controlling *pcaV*.

| Construct | Set        | $P_{\text{reg}}$ | $P_{\text{out}}$ | RBS <sub>out</sub> | OFF             | ON               | ON/OFF       |
|-----------|------------|------------------|------------------|--------------------|-----------------|------------------|--------------|
| p131C-B20 | validation | -1.00            | 1                | 1                  | 14705.3 ± 430.2 | 69296.2 ± 407.9  | 4.7 ± 0.15   |
| p131C-B9  | validation | -0.56            | 1                | 1                  | 1418.5 ± 43.9   | 66255.0 ± 1099.0 | 46.7 ± 1.6   |
| p131C-B3  | validation | -0.28            | 1                | 1                  | 816.9 ± 14.5    | 62160.1 ± 984.2  | 76.1 ± 0.57  |
| pD2       | training   | 0                | 1                | 1                  | 397.9 ± 3.4     | 62070.6 ± 1042.1 | 156.0 ± 1.5  |
| p131C-B10 | validation | 0.14             | 1                | 1                  | 187.3 ± 0.7     | 51858.5 ± 507.6  | 276.8 ± 3.34 |
| p131C-B6  | validation | 0.36             | 1                | 1                  | 170.8 ± 1.6     | 39229.3 ± 796.1  | 229.7 ± 6.79 |
| p131C-B18 | validation | 0.67             | 1                | 1                  | 338.2 ± 7.2     | 20486.1 ± 166.1  | 60.6 ± 1.23  |
| pD7       | training   | 1                | 1                | 1                  | 1282.1 ± 37.9   | 47138.5 ± 1702.8 | 36.8 ± 1.6   |

OFF and ON measurements were made in the absence or presence of 1 mM PCA, respectively. The values for OFF, ON and OFF/ON indicate the mean of three biological replicates with ± denoting the standard deviation of those replicates.

**Supplementary Table 5.** Comparison of the original and optimised PAB.

| <b>PCA biosensor</b> | <b>OFF</b>  | <b>ON</b>       | <b>ON/OFF</b> | <b>EC<sub>50</sub> (µM)</b> |
|----------------------|-------------|-----------------|---------------|-----------------------------|
| original             | 7.5 ± 8.0   | 3121.2 ± 88.4   | 417.4 ± 95.9  | 537                         |
| p131C-B10            | 186.5 ± 5.6 | 97099.3 ± 612.4 | 521.1 ± 18.9  | 897                         |

The titration was carried out with a PCA concentration ranging from 3.9 to 4000 µM. OFF and ON measurements were made in the absence or presence of 4 mM PCA, respectively. The values for OFF, ON and OFF/ON indicate the mean of three biological replicates with ± denoting the standard deviation of those replicates.

**Supplementary Table 6.** Tuning the chromosome-integrated PAB for optimal performance by varying the level of  $P_{\text{reg}}$  controlling *pcaV*.

| Construct | $P_{\text{reg}}$ | $P_{\text{out}}$ | RBS <sub>out</sub> | OFF            | ON             | ON/OFF       |
|-----------|------------------|------------------|--------------------|----------------|----------------|--------------|
| pDK-B9    | -0.56            | 1                | 1                  | 6562.6 ± 62.4  | 7163.7 ± 38.4  | 1.09 ± 0.02  |
| pDK-B20   | 0.00             | 1                | 1                  | 2826.0 ± 92.8  | 7066.3 ± 43.8  | 2.50 ± 0.09  |
| pDK-B10   | 0.14             | 1                | 1                  | 2543.5 ± 16.6  | 6841.8 ± 97.9  | 2.69 ± 0.05  |
| pDK-B6    | 0.36             | 1                | 1                  | 688.7 ± 24.3   | 6628.1 ± 83.8  | 9.63 ± 0.37  |
| pDK-B17   | 0.53             | 1                | 1                  | 357.5 ± 2.8    | 7071.9 ± 87.4  | 19.78 ± 0.25 |
| pDK-B15   | 0.61             | 1                | 1                  | 155.9 ± 3.0    | 6677.9 ± 191.8 | 42.85 ± 1.53 |
| pDK-B18   | 0.67             | 1                | 1                  | 205.6 ± 6.9    | 7200.8 ± 135.6 | 35.05 ± 1.29 |
| pDK-B23   | 0.77             | 1                | 1                  | 264.1 ± 2.1    | 6721.3 ± 140.4 | 25.44 ± 0.35 |
| pDK-B16   | 0.94             | 1                | 1                  | 284.2 ± 9.6    | 6910.2 ± 135.6 | 24.34 ± 1.23 |
| pDK-B12   | 1.00             | 1                | 1                  | 5759.6 ± 117.7 | 6956.9 ± 71.4  | 1.21 ± 0.03  |

OFF and ON measurements were made in the absence or presence of 1 mM PCA, respectively. The values for OFF, ON and OFF/ON indicate the mean of three biological replicates with ± denoting the standard deviation of those replicates.

**Supplementary Table 7.** Comparison of the sensitivity of the PAB to PCA with and without the PcaK transporter.

| <b>PCA biosensor</b> | <b>OFF</b>   | <b>ON</b>        | <b>ON/OFF</b> | <b>EC<sub>50</sub> (μM)</b> |
|----------------------|--------------|------------------|---------------|-----------------------------|
| p131C-B10            | 164.1 ± 4.5  | 72521.7 ± 1656.3 | 442.1 ± 13.2  | 557                         |
| p131C-B10-pcaK       | 359.7 ± 11.7 | 68864.9 ± 1133.7 | 191.6 ± 6.4   | 0.335                       |

The titration was carried out with a PCA concentration ranging from 0.0038 to 4000 μM. OFF and ON measurements were made in the absence or presence of 4 mM PCA, respectively. The values for OFF, ON and OFF/ON indicate the mean of three biological replicates with ± denoting the standard deviation of those replicates.

**Supplementary Table 8.** Assessment of the performance of dose-response extender variants.

| Dose-response extender | OFF                 | ON                       | ON/OFF           | Hill coefficient  | EC50 ( $\mu\text{M}$ ) | DRLR  |
|------------------------|---------------------|--------------------------|------------------|-------------------|------------------------|-------|
| reporter only          | 181.5<br>$\pm 10.3$ | 81004.9 $\pm$<br>356.6   | 447.2 $\pm$ 24.1 | 0.980 $\pm$ 0.041 | 281.8 $\pm$ 24.5       | 88.7  |
| PcaK_-1_Lacl_-1        | 302.7<br>$\pm 27.3$ | 104898.5 $\pm$<br>1063.7 | 348.3 $\pm$ 29.9 | 1.65 $\pm$ 0.33   | 1.73 $\pm$ 0.19        | 14.4  |
| PcaK_-1_Lacl_0         | 210.2<br>$\pm 42.2$ | 79030.1 $\pm$<br>22808.3 | 374.3 $\pm$ 79   | 0.926 $\pm$ 0.29  | 11.5 $\pm$ 4.9         | 117.8 |
| PcaK_0_Lacl_-1         | 417.0<br>$\pm 51.8$ | 105094.9 $\pm$<br>4218.8 | 254.2 $\pm$ 3    | 1.58 $\pm$ 0.14   | 0.948 $\pm$ 0.067      | 16.3  |
| PcaK_0_Lacl_0          | 263.1<br>$\pm 12.4$ | 99438.9 $\pm$<br>2299.6  | 378.6 $\pm$ 23.4 | 1.42 $\pm$ 0.089  | 1.94 $\pm$ 0.09        | 22.1  |
| PcaK_1_Lacl_-1         | 382 $\pm$<br>15.2   | 105063.1 $\pm$<br>5121.3 | 275.3 $\pm$ 16.0 | 1.79 $\pm$ 0.4    | 0.354 $\pm$ 0.02       | 11.7  |
| PcaK_1_Lacl_0          | 170.6<br>$\pm 6.8$  | 102360.6 $\pm$<br>155.3  | 600.6 $\pm$ 24.8 | 1.69 $\pm$ 0.12   | 1.65 $\pm$ 0.059       | 13.6  |

The titration was carried out with a PCA concentration ranging from to 0.0128 to 1000  $\mu\text{M}$ . OFF and ON measurements were made in the absence or presence of 1 mM PCA, respectively. The values for OFF, ON and OFF/ON indicate the mean of three biological replicates with  $\pm$  denoting the standard deviation of those replicates.



**Supplementary Table 9.** Comparison of dynamic range of the PAB against popular expression systems.

| <b>Expression system</b>                   | <b>ON/OFF 3 h</b> | <b>ON/OFF 24 h</b> |
|--------------------------------------------|-------------------|--------------------|
| $P_{\text{araBAD}}/\text{AraC}$            | 178.5 ± 12.2      | 36.3 ± 1.3         |
| $P_{\text{pv}}/\text{PcaV}$                | 224.5 ± 2.9       | 219.2 ± 12.0       |
| $P_{\text{lac}}/\text{LacI}/\text{T7RNAP}$ | 363.2 ± 25.6      | 84.0 ± 1.0         |
| $P_{\text{rhaBAD}}/\text{RhaS}$            | 27.4 ± 1.8        | 2.9 ± 0.2          |

The following inducers were used: L-arabinose for  $P_{\text{araBAD}}/\text{AraC}$ ; PCA for  $P_{\text{pv}}/\text{PcaV}$ ; IPTG for  $P_{\text{lac}}/\text{LacI}/\text{T7RNAP}$ ; and L-mannose for  $P_{\text{rhaBAD}}/\text{RhaS}$ . Titrations were carried out with inducers at concentrations ranging from 3.9 to 4000  $\mu\text{M}$ . OFF and ON measurements were made in the absence or presence of 4 mM of inducer, respectively. The values for OFF/ON indicate the mean of three biological replicates with  $\pm$  denoting the standard deviation of those replicates.

**Supplementary Table 10.** Raw data for the FAB full factorial design.

| Construct | Trial | $P_{\text{regC}}$ | $P_{\text{enzA}}$ | $\text{RBS}_{\text{out}}$ | OFF            |         |         | ON      |                |
|-----------|-------|-------------------|-------------------|---------------------------|----------------|---------|---------|---------|----------------|
| pFABs1    | 1     | -1                | -1                | 1                         | 14966          | 15030.4 | 14469.1 | 102558  | 93161.893772.3 |
| pFABs2    | 2     | -1                | 0                 | 1                         | 8262.1         | 7285.6  | 7940.3  | 91256.4 | 86897.794597.5 |
| pFABs3    | 3     | -1                | 1                 | 1                         | 33529.833274.8 | 33699.2 |         | 90905.3 | 94533.295824.9 |
| pFABs4    | 4     | 0                 | -1                | 1                         | 6846.6         | 6608.7  | 6492.1  | 89215.4 | 87395.590105.1 |
| pFABs5    | 5     | 0                 | 0                 | 1                         | 6769.1         | 6876.2  | 6683.6  | 88137.9 | 86719.389006.7 |
| pFABs6    | 6     | 0                 | 1                 | 1                         | 6552.8         | 6517    | 6039.9  | 88549.2 | 89600.488144.6 |
| pFABs7    | 7     | 1                 | -1                | 1                         | 2076.8         | 2164.6  | 2180.1  | 79578.6 | 85037.884313.2 |
| pFABs8    | 8     | 1                 | 0                 | 1                         | 1971.8         | 2042.2  | 1868.6  | 75845.8 | 78895.376475.9 |
| pFABs9    | 9     | 1                 | 1                 | 1                         | 1356.1         | 1396.5  | 1545.8  | 71633.6 | 77672.775372.2 |

**Supplementary Table 11.** Tuning the FAB for optimal dynamic range by varying the level of  $RBS_{out}$  controlling the sfGFP output.

| Construct | $P_{regC}$ | $P_{enzA}$ | $RBS_{out}$ | OFF              | ON            | ON/OFF      |
|-----------|------------|------------|-------------|------------------|---------------|-------------|
| pFABs9    | 1          | 1          | 1           | 83845.3 ± 2968.9 | 1378.4 ± 13.7 | 60.8 ± 2.0  |
| pFABsG21  | 1          | 1          | 0.94        | 76569.2 ± 2157.5 | 1018.2 ± 33.8 | 75.2 ± 0.8  |
| pFABsG19  | 1          | 1          | 0.89        | 62005.7 ± 2732.2 | 666.2 ± 20.4  | 93.1 ± 4.0  |
| pFABsG12  | 1          | 1          | 0.81        | 30783.2 ± 1224.7 | 261.5 ± 11.3  | 117.7 ± 8.4 |

OFF and ON measurements were made in the absence or presence of 1 mM FA, respectively. The values for OFF, ON and OFF/ON indicate the mean of three biological replicates with ± denoting the standard deviation of those replicates.

**Supplementary Table 12.** Primer used in this study.

| <b>Primer name</b> | <b>Sequence</b>                                                                                                                                     |
|--------------------|-----------------------------------------------------------------------------------------------------------------------------------------------------|
| AB 09              | GCGGCCGCGTCGTGACTGGGAAAA                                                                                                                            |
| AB 10              | GGCCTAGGCGGCCTCCTGTGTGAAATTG                                                                                                                        |
| AB 11              | AGCGGATAACAATTTACACAGGA                                                                                                                             |
| AB 12              | CGCCAGGGTTTTCCCAGTCA                                                                                                                                |
| AB 15              | AACAATTTACACAGGAGGCCGCTAGGCCTTATTTATACAGTTCGTCCATACCGC                                                                                              |
| AB 18              | CCAGGGTTTTCCCAGTCACGACGCGGCCGCTTATTTATACAGTTCATCCATACCATG<br>GG                                                                                     |
| AB 27              | ATGAGCAAAGGTGAAGAACTGTTTAC                                                                                                                          |
| AB 28              | ATGGTTTCTAAAGGTGAAGAAGAC                                                                                                                            |
| AB 29              | GCTCGGATCCACTAGTAGAGG                                                                                                                               |
| AB 30              | CGGTACCGCATGCAATCAT                                                                                                                                 |
| AB 34              | GAAAGTACGTGCAGCCAGAG                                                                                                                                |
| AB 39              | CCAAATCGCAGCCAATCACA                                                                                                                                |
| AB 40              | GGTTATCTGGCAGCCGAAAG                                                                                                                                |
| AB 61              | GAATCCAGAAAAGCGGCCAT                                                                                                                                |
| AB 94              | AGTCAACACTCTTTTTGATAAATTTTGCATGC                                                                                                                    |
| AB 95              | GCATGCAAAATTTATCAAAAAGAGTG                                                                                                                          |
| AB 100             | GGAATTCCATATGTTTTATCCTCTACTAGTTTATTTTTGACACCAGACCAACTGGTAAT<br>G                                                                                    |
| AB 101             | GGAGGATATTCATATAGACCATGATTGCATAGCGGATAACAATTTACACAGGA                                                                                               |
| AB 114             | CATGCAAAATTTATCAAAAAGAGTGTTGACTATACTCAGTGCCCTGACTATGATACTTA<br>GATTCATACTCAGTGCCCTGACTATTTTAACTTTAAGANNNNNTATACATATGAGCA<br>AAGGTGAAGAACTGTTTACCG   |
| AB 115             | CATGCAAAATTTATCAAAAAGAGTGTTNANNATACTCAGTGCCCTGACTATNATNNTT<br>AGATTCATACTCAGTGCCCTGACTATTTTAACTTTAAGAAGGAGATATACATATGAGC<br>AAAGGTGAAGAACTGTTTACCG  |
| AB 127             | GTTTAACTTTGAAATAAGGAGGTAATACAAATGGCAGCAGTTGATCTGGCAAC                                                                                               |
| AB 128             | TTGTATTACCTCCTTATTTCAAAGTTAAAC                                                                                                                      |
| AB 129             | CCATCGGAAGCTGTGGTATG                                                                                                                                |
| AB 130             | GATTTACGACCTGCACAGCC                                                                                                                                |
| AB 142             | CATGCAAAATTTATCAAAAAGAGTGTTTCATGATACTCAGTGCCCTGACTATAATGATTA<br>GATTCATACTCAGTGCCCTGACTATTTTAACTTTAAGATAGTCATATACATATGAGCAA<br>AGGTGAAGAACTGTTTACCG |
| AB 143             | CATGCAAAATTTATCAAAAAGAGTGTTTCATGATACTCAGTGCCCTGACTATAATGATTA<br>GATTCATACTCAGTGCCCTGACTATTTTAACTTTAAGAAGGGTGTATACATATGAGCA                          |

AAGGTGAAGAACTGTTTACCG  
 AB 144 CATGCAAATTTATCAAAAAGAGTGTTAAAGATACTCAGTGCCCTGACTATTATGTTTA  
 GATTCATACTCAGTGCCCTGACTATTTTAACTTTAAGATAGTCATATACATATGAGCAA  
 AAGGTGAAGAACTGTTTACCG  
 AB 145 CATGCAAATTTATCAAAAAGAGTGTTAAAGATACTCAGTGCCCTGACTATTATGTTTA  
 GATTCATACTCAGTGCCCTGACTATTTTAACTTTAAGAAGGGTGTATACATATGAGCA  
 AAGGTGAAGAACTGTTTACCG  
 AB 146 CCACAACGGTTTCCCTCTAC  
 AB 147 CATAGACCTAGGGCAGCAGA  
 AB 148 AAAATTATTTGTAGAGGGAAACCGTTGTGGTCTCCCTGAATATANNNTACGAGCCTTA  
 TGCATGCCCGTAAAGTTATCCAGCAACCACTCATAGACCTAGGGCAGCAGATAGGGA  
 CGAC  
 AB 159 GCCCATATGTATATCTCCTTCTTAAAG  
 AB 160 TGTTAATTAAGTTGGGCGTTCC  
 AB 161 GTTTAACTTTAAGAAGGAGATATACATATGAGCAAAGGTGAAGAACTGTTTAC  
 AB 162 GCCTAGGAACGCCCAACTTAATTAACATTATTTATACAGTTCATCCATACCATGGG  
 AB 163 CATGGTATATCTCCTTCTTAAAGTTAAAC  
 AB 164 CTGTTTTGGCGGATGAGAGA  
 AB 165 TTTTGTTTAACTTTAAGAAGGAGATATACCATGAGCAAAGGTGAAGAACTGTTTAC  
 AB 166 CTGAAAATCTTCTCTCATCCGCCAAAACAGTTATTTATACAGTTCATCCATACCATGG  
 G  
 AB 167 TCAACCCGGTGCAACTGC  
 AB 195 CATATGTATACACCCTTCTTAAAGTTAAA  
 AB 196 GGCAAAAACATTATCCAGAACG  
 AB 197 TTTAACTTTAAGAAGGGTGTATACATATGGTGAACCAGTAACGTTATACGATG  
 AB 198 CCAGGGTTTTCCAGTCACGACGCGGCCGCTCACTGCCCGCTTTCCAG  
 AB 199 ACGTCTAAGCTTTTACCTACAGAATTTTGC GCCTGATTCATATGTATATGACTATCTTA  
 AAGTTAAAGGTGAGTGCCTGCTGATGTGCTCAGTATCTTGTTATCCGCTCACAAT  
 GTCAATTGTTATCCGCTCACAATTCTCGAGGGCAAAAACATTATCCAGAACGGGAGT  
 GCGCC  
 FAB 1 GGCCGATTCATTAATGCAGCTGACGCAATTAATGTAAGTTAGCT  
 FAB 2 GATGATTTCTCGGTACCGCATGTAACAAAGCCCGAAAGGAAG  
 FAB 3 AGCTTCCTTTCCGGCTTTGTTACATGCGGTACCGAGAAATCATC  
 FAB 4 CTTCCGATGGCTGCCTGACGCCAGTAGTAGGTTGAGGCCGTT  
 FAB 5 TCAACGGCCTCAACCTACTACTGGCGTCAGGCAGCCATCGGA  
 FAB 6 AGCTAACTTACATTAATTGCGTCAGCTGCATTAATGAATCGGCCAAC  
 FAB 7 ATGAGCAAAGGTGAAGAACTGTTTACCG  
 FAB 8 CTCCCGTTCTGGATAATGTTTTTTGCC  
 FAB 9 CTTTGAAATAAGGAGGTAATACAAATGGCCGTTGAAGCCGGTGTTTCGTC

FAB 10 GGCAAAAACATTATCCAGAACGGGAGTGCGCC  
 FAB 11 GCACTCCCGTTCTGGATAATGTTTTTGGCCACAGCTAACACCACGTC  
 FAB 12 GATCATCCTGACGCATACGTTACCCATTTGTATTACCTCCTTATTTCAAAGTTA  
 FAB 13 TAACTTTGAAATAAGGAGGTAATACAAATGGGTGAACGTATGCGTCAGGATGATC  
 FAB 14 GATAGGGACGACGTGGTGTAGCTGTGTCTAGAATAAAACGAAAGGCCAGTCTTC  
 FAB 15 GAAGACTGGGCCTTTCGTTTTATTCTAGACACAGCTAACACCACGTCGTCCCTATC  
 FAB 16 CTGAGGACGAACACCGGCTTCAACGGCCATTTGTATTACCTCCTTATTTCAAAGTTAA  
 AC  
 FAB 17 TCTAGACCATCGAATGGTGCAAAACCTTTCGCG  
 FAB 18 GGCAAAAACATTATCCAGAACGGGAGTGCGCC  
 FAB 19 GGCCGATTCATTAATGCAGCTGACGCAATTAATGTAAGTTAGCT  
 FAB 20 GTTACTGGTTTCACATTCACCACCC  
 FAB 21 GATTTAACTTTAAGACTTTGGTATACATATGAGCAAAGGTGAAGAACT  
 FAB 22 GATTTAACTTTAAGAGGCTTATATACATATGAGCAAAGGTGAAGAACT  
 FAB 23 GATTTAACTTTAAGAGGGAGGTATACATATGAGCAAAGGTGAAGAACT  
 FAB 24 CTTAAAGTTAAATCGGTCAGTGCGTCATGC  
 AB 301 ATGGTGAAACCAGTAACGTTATACGATGTGCG  
 AB 302 ATGAATCAGGCGCAAAATTCTGTAGGTAAAAGC  
 AB 303 GCTTTTACCTACAGAATTTTGC GCCTGATTCATATGTATACACCCTTCTTAAAGTTAAA  
 GGTCAGTGCGTCCTGCTGATGTGCTCAGTATCTTGTTATCCGCTCACAATGTCAATTG  
 TTATCCGCTCACAATTCTCGAGGGCAAAAACATTATCCAGAACGGGAGTGCGCCTT  
 GAGCGACACGAATTATGCAGTGATTTACGACCTGCACAGCCATACCACAGCTTCCGA  
 TGGCTGCCTGACGCCAGAAGCATTGGTGCACCGTGCAGTCGATGATAAGCTGTCAA  
 ACGCATGCAAAATTTATCAAAAAGAGTGTTGACTATACTCAGTGCCCTGACTATGATA  
 CTTAGATTCATACTCAGTGCCCTGACTATTTTAACTTTAAGAAGGGTGTATACATATGG  
 TGAAACCAGTAACGTTATACGATGTGCG  
 AB 304 GCTTTTACCTACAGAATTTTGC GCCTGATTCATATGTATATGACTATCTTAAAGTTAAA  
 GGTCAGTGCGTCCTGCTGATGTGCTCAGTATCTTGTTATCCGCTCACAATGTCAATTG  
 TTATCCGCTCACAATTCTCGAGGGCAAAAACATTATCCAGAACGGGAGTGCGCCTT  
 GAGCGACACGAATTATGCAGTGATTTACGACCTGCACAGCCATACCACAGCTTCCGA  
 TGGCTGCCTGACGCCAGAAGCATTGGTGCACCGTGCAGTCGATGATAAGCTGTCAA  
 ACGCATGCAAAATTTATCAAAAAGAGTGTTGACTATACTCAGTGCCCTGACTATGATA  
 CTTAGATTCATACTCAGTGCCCTGACTATTTTAACTTTAAGAAGGGTGTATACATATGG  
 TGAAACCAGTAACGTTATACGATGTGCG  
 AB 305 GCTTTTACCTACAGAATTTTGC GCCTGATTCATATGTATATCTCCTTCTTAAAGTTAAA  
 GGTCAGTGCGTCCTGCTGATGTGCTCAGTATCTTGTTATCCGCTCACAATGTCAATTG  
 TTATCCGCTCACAATTCTCGAGGGCAAAAACATTATCCAGAACGGGAGTGCGCCTT  
 GAGCGACACGAATTATGCAGTGATTTACGACCTGCACAGCCATACCACAGCTTCCGA  
 TGGCTGCCTGACGCCAGAAGCATTGGTGCACCGTGCAGTCGATGATAAGCTGTCAA

ACGCATGCAAAATTTATCAAAAAGAGTGTTGACTATACTCAGTGCCCTGACTATGATA  
 CTTAGATTCATACTCAGTGCCCTGACTATTTTAACTTTAAGAAGGGTGTATACATATGG  
 TGAAACCAGTAACGTTATACGATGTCTG

AB 306 GCTTTTACCTACAGAATTTTGC GCCTGATTCATATGTATACACCCTTCTTAAAGTTAAA  
 GGTCAAGTGCCTCCTGCTGATGTGCTCAGTATCTTGTTATCCGCTCACAATGTCAATTG  
 TTATCCGCTCACAATTCTCGAGGGCAAAAACATTATCCAGAACGGGAGTGCGCCTT  
 GAGCGACACGAATTATGCAGTGATTTACGACCTGCACAGCCATACCACAGCTTCCGA  
 TGGCTGCCTGACGCCAGAAGCATTGGTGCACCGTGCAGTCGATGATAAGCTGTCAA  
 ACGCATGCAAAATTTATCAAAAAGAGTGTTGACTATACTCAGTGCCCTGACTATGATA  
 CTTAGATTCATACTCAGTGCCCTGACTATTTTAACTTTAAGATAGTCATATACATATGG  
 TGAAACCAGTAACGTTATACGATGTCTG

AB 307 GCTTTTACCTACAGAATTTTGC GCCTGATTCATATGTATACACCCTTCTTAAAGTTAAA  
 GGTCAAGTGCCTCCTGCTGATGTGCTCAGTATCTTGTTATCCGCTCACAATGTCAATTG  
 TTATCCGCTCACAATTCTCGAGGGCAAAAACATTATCCAGAACGGGAGTGCGCCTT  
 GAGCGACACGAATTATGCAGTGATTTACGACCTGCACAGCCATACCACAGCTTCCGA  
 TGGCTGCCTGACGCCAGAAGCATTGGTGCACCGTGCAGTCGATGATAAGCTGTCAA  
 ACGCATGCAAAATTTATCAAAAAGAGTGTTGACTATACTCAGTGCCCTGACTATGATA  
 CTTAGATTCATACTCAGTGCCCTGACTATTTTAACTTTAAGAAGGAGATATACATATGG  
 TGAAACCAGTAACGTTATACGATGTCTG

AB 308 GCTTTTACCTACAGAATTTTGC GCCTGATTCATATGTATATGACTATCTTAAAGTTAAA  
 GGTCAAGTGCCTCCTGCTGATGTGCTCAGTATCTTGTTATCCGCTCACAATGTCAATTG  
 TTATCCGCTCACAATTCTCGAGGGCAAAAACATTATCCAGAACGGGAGTGCGCCTT  
 GAGCGACACGAATTATGCAGTGATTTACGACCTGCACAGCCATACCACAGCTTCCGA  
 TGGCTGCCTGACGCCAGAAGCATTGGTGCACCGTGCAGTCGATGATAAGCTGTCAA  
 ACGCATGCAAAATTTATCAAAAAGAGTGTTGACTATACTCAGTGCCCTGACTATGATA  
 CTTAGATTCATACTCAGTGCCCTGACTATTTTAACTTTAAGATAGTCATATACATATGG  
 TGAAACCAGTAACGTTATACGATGTCTG

AB 309 GCTTTTACCTACAGAATTTTGC GCCTGATTCATATGTATATCTCCTTCTTAAAGTTAAA  
 GGTCAAGTGCCTCCTGCTGATGTGCTCAGTATCTTGTTATCCGCTCACAATGTCAATTG  
 TTATCCGCTCACAATTCTCGAGGGCAAAAACATTATCCAGAACGGGAGTGCGCCTT  
 GAGCGACACGAATTATGCAGTGATTTACGACCTGCACAGCCATACCACAGCTTCCGA  
 TGGCTGCCTGACGCCAGAAGCATTGGTGCACCGTGCAGTCGATGATAAGCTGTCAA  
 ACGCATGCAAAATTTATCAAAAAGAGTGTTGACTATACTCAGTGCCCTGACTATGATA  
 CTTAGATTCATACTCAGTGCCCTGACTATTTTAACTTTAAGATAGTCATATACATATGG  
 TGAAACCAGTAACGTTATACGATGTCTG

**Supplementary Table 13.** Plasmid used or constructed in this study

| Plasmid name                                               | Relevant characteristics <sup>a</sup>                                                                                     | Source or reference |
|------------------------------------------------------------|---------------------------------------------------------------------------------------------------------------------------|---------------------|
| pSEVA131                                                   | Cloning vector; <i>oriV</i> (pBBR1), Am <sup>r</sup>                                                                      | (9)                 |
| pSEVA 261                                                  | Cloning vector; <i>oriV</i> (p15A), Km <sup>r</sup>                                                                       | (9)                 |
| pET28a                                                     | Expression vector; <i>P</i> <sub>lac</sub> /LacI/T7RNAP; <i>oriV</i> (pBR322), Km <sup>r</sup>                            | Merck               |
| pET44a                                                     | Expression vector; <i>P</i> <sub>lac</sub> /LacI/T7RNAP; <i>oriV</i> (pBR322), Am <sup>r</sup>                            | Merck               |
| pBAD                                                       | Expression vector; <i>P</i> <sub>araBAD</sub> /AraC; <i>oriV</i> (pBR322), Am <sup>r</sup>                                | ThermoFisher        |
| pCK302                                                     | sfGFP expression vector; <i>P</i> <sub>rhaBAD</sub> /RhaS; <i>oriV</i> (pBR322), Am <sup>r</sup>                          | (10)                |
| pKIKOarsBKm                                                | Integration vector; <i>oriV</i> (RK6), Am <sup>r</sup> , Km <sup>r</sup>                                                  | (6)                 |
| p131B                                                      | Template vector with <i>mCherry</i> and <i>sfGFP</i> ; <i>oriV</i> (pBBR1), Am <sup>r</sup>                               | This study          |
| p131B-BX <sup>b</sup>                                      | <i>P</i> <sub>reg</sub> -library vectors; <i>oriV</i> (pBBR1), Am <sup>r</sup>                                            | This study          |
| p131B-GX <sup>b</sup>                                      | RBS <sub>out</sub> -library vectors; <i>oriV</i> (pBBR1), Am <sup>r</sup>                                                 | This study          |
| p131-VX <sup>b</sup>                                       | <i>P</i> <sub>out</sub> -library vectors; <i>oriV</i> (pBBR1), Am <sup>r</sup>                                            | This study          |
| pDX                                                        | DoE PCA biosensor vectors; <i>oriV</i> (pBBR1), Am <sup>r</sup>                                                           | This study          |
| p131CB-X <sup>b</sup>                                      | DoE PCA biosensor validation vectors; <i>oriV</i> (pBBR1), Am <sup>r</sup>                                                | This study          |
| pDK-BX                                                     | DoE PCA biosensor integration vectors; <i>oriV</i> (pBBR1), Am <sup>r</sup>                                               | This study          |
| pET44-sfGFP                                                | sfGFP expression vector; <i>P</i> <sub>lac</sub> /LacI/T7RNAP; <i>oriV</i> (pBR322), Am <sup>r</sup>                      | This study          |
| pBAD-sfGFP                                                 | sfGFP expression vector; <i>P</i> <sub>araBAD</sub> /AraC; <i>oriV</i> (pBR322), Am <sup>r</sup>                          | This study          |
| pFABsP <sub>LC</sub>                                       | FA biosensor vector promoter variant <i>P</i> <sub>LC</sub> ; <i>oriV</i> (pBR322), Km <sup>r</sup>                       | This study          |
| pFABsP <sub>LC2</sub>                                      | FA biosensor vector promoter variant <i>P</i> <sub>LC2</sub> ; <i>oriV</i> (pBR322), Km <sup>r</sup>                      | This study          |
| pFABsP <sub>LC2</sub> FerC KO                              | FA biosensor vector promoter variant <i>P</i> <sub>LC2</sub> $\Delta$ <i>ferC</i> ; <i>oriV</i> (pBR322), Km <sup>r</sup> | This study          |
| pFABsP <sub>LC2</sub> FerA KO                              | FA biosensor vector promoter variant <i>P</i> <sub>LC2</sub> $\Delta$ <i>ferA</i> ; <i>oriV</i> (pBR322), Km <sup>r</sup> | This study          |
| pFABsX (DOE)                                               | DoE FA biosensor vectors; <i>oriV</i> (pBR322), Km <sup>r</sup>                                                           | This study          |
| pFABsG12                                                   | DoE FA biosensor variant RBS <sub>out</sub> at 0.81; <i>oriV</i> (pBR322), Km <sup>r</sup>                                | This study          |
| pFABsG19                                                   | DoE FA biosensor variant RBS <sub>out</sub> at 0.89; <i>oriV</i> (pBR322), Km <sup>r</sup>                                | This study          |
| pFABsG21                                                   | DoE FA biosensor variant RBS <sub>out</sub> at 0.94; <i>oriV</i> (pBR322), Km <sup>r</sup>                                | This study          |
| p261LacI[X] <sub>1</sub> PcaK[X] <sub>2</sub> <sup>b</sup> | DoE PCA biosensor extender vectors; <i>oriV</i> (p15A), Km <sup>r</sup>                                                   | This study          |

**a.** Antibiotic markers: Am<sup>r</sup>, ampicillin; Km<sup>r</sup>, kanamycin

**b.** For these plasmids X denotes a library member or DoE variant



## References

1. Davis, J.H., Rubin, A.J. and Sauer, R.T. (2011) Design, construction and characterization of a set of insulated bacterial promoters. *Nucleic Acids Res.*, **39**, 1131-1141.
2. Rogers, J.K., Guzman, C.D., Taylor, N.D., Raman, S., Anderson, K. and Church, G.M. (2015) Synthetic biosensors for precise gene control and real-time monitoring of metabolites. *Nucleic Acids Res.*, **43**, 7648-7660.
3. Machado, L.F.M., Currin, A. and Dixon, N. (2019) Directed evolution of the PcaV allosteric transcription factor to generate a biosensor for aromatic aldehydes. *J. Biol. Eng.* **13**, 91
4. Karig, D.K., Iyer, S., Simpson, M.L. and Doktycz, M.J. (2012) Expression optimization and synthetic gene networks in cell-free systems. *Nucleic Acids Res.*, **40**, 3763-3774.
5. Benedetti, I., Nikel, P.I. and de Lorenzo, V. (2016) Data on the standardization of a cyclohexanone-responsive expression system for Gram-negative bacteria. *Data Brief*, **6**, 738-744.
6. Sabri, S., Steen, J.A., Bongers, M., Nielsen, L.K. and Vickers, C.E. (2013) Knock-in/Knock-out (KIKO) vectors for rapid integration of large DNA sequences, including whole metabolic pathways, onto the *Escherichia coli* chromosome at well-characterised loci. *Microb. Cell Fact.*, **12**, 60.
7. Machado, L.F. and Dixon, N. (2016) Development and substrate specificity screening of an in vivo biosensor for the detection of biomass derived aromatic chemical building blocks. *Chem. Commun. (Camb)*, **52**, 11402-11405.
8. Lutz, R. and Bujard, H. (1997) Independent and tight regulation of transcriptional units in *Escherichia coli* via the LacR/O, the TetR/O and AraC/I1-I2 regulatory elements. *Nucleic Acids Res.*, **25**, 1203-1210.
9. Silva-Rocha, R., Martinez-Garcia, E., Calles, B., Chavarria, M., Arce-Rodriguez, A., de Las Heras, A., Paez-Espino, A.D., Durante-Rodriguez, G., Kim, J., Nikel, P.I. *et al.* (2013) The Standard European Vector Architecture (SEVA): a coherent platform for the analysis and deployment of complex prokaryotic phenotypes. *Nucleic Acids Res.*, **41**, D666-675.
10. Kelly, C.L., Liu, Z., Yoshihara, A., Jenkinson, S.F., Wormald, M.R., Otero, J., Estevez, A., Kato, A., Marqvorsen, M.H., Fleet, G.W. *et al.* (2016) Synthetic chemical inducers and genetic decoupling enable orthogonal control of the rhaBAD promoter. *ACS Synth. Biol.*, **5**, 1136-1145.
